# Supplementary material for: Abiotic Factors from Different Ecuadorian Regions and Their Contribution to Antioxidant, Metabolomic and Organoleptic Quality of Theobroma cacao L. Beans, Variety “Arriba Nacional”
Source: MDPI journal article supplement (doi:10.3390/plants11070976), 2022-04-03
Supplement: s1 [file s1]

Abiotic factors from different Ecuadorian regions and its contribution to antioxidant, metabolomic and organoleptic quality of *Theobroma cacao* L. beans, variety “Arriba Nacional”  
 Raluca A. Mihai<sup>1a\*</sup>, Pablo A. Landazuri Abarca<sup>1b</sup>, Bryan A. Romero Tinizaray<sup>2</sup>, Larisa I. Florescu<sup>3</sup>,  
 Rodica D. Catană<sup>3\*</sup> and Anna Kosakyan<sup>4</sup>

**Table S1.** The alkaloids compounds (caffeine, theobromine) of “Arriba Nacional” cocoa variety collected from the three regions studied.

| Region   | Alkaloids              |                           |
|----------|------------------------|---------------------------|
|          | Caffeine<br>(mg/100 g) | Theobromine<br>(mg/100 g) |
| Amazonia | 330 ± 60 S.D.          | 2540 ± 190 S.D.           |
| Andes    | 530 ± 40 S.D.          | 2510 ± 120 S.D.           |
| Coast    | 190 ± 23 S.D.          | 1500 ± 130 S.D.           |

**Table S2.** The antioxidants of “Arriba Nacional” cocoa variety collected from the three regions studied.

| Region   | Antioxidants        |                     |                   |                             |                        |                           |                              |
|----------|---------------------|---------------------|-------------------|-----------------------------|------------------------|---------------------------|------------------------------|
|          | TPC<br>(mg/100 g)   | TFC<br>(mg/100 g)   | TAC<br>(mg/100 g) | T-resveratrol<br>(mg/100 g) | Catechin<br>(mg/100 g) | Epicatechin<br>(mg/100 g) | Phenolic acids<br>(mg/100 g) |
| Amazonia | 297.00 ± 32.99 S.D. | 69.89 ± S.D.        | 22.23 ± 1.50 S.D. | 0.076 ± 0.008 S.D.          | 723 ± 126 S.D.         | 974 ± 402 S.D.            | 249.4 ± 43 S.D.              |
| Andes    | 246.00 ± 17.42 S.D. | 89.15 ± 7.67 S.D.   | 21.28 ± 0.59 S.D. | 0.100 ± 0.008 S.D.          | 568 ± 5 S.D.           | 590 ± 54 S.D.             | 183.6 ± 5 S.D.               |
| Coast    | 229.71 ± 9.78 S.D.  | 114.97 ± 12.04 S.D. | 22.80 ± 0.95 S.D. | 0.068 ± 0.010 S.D.          | 515 ± 33 S.D.          | 535 ± 37 S.D.             | 206.0 ± 64 S.D.              |

Legend: TPC – total phenolic content, TFC – total flavonoids content, TAC – total anthocyanin content
